# Supplementary material for: Phytochemical Analysis of Tephrosia vogelii across East Africa Reveals Three Chemotypes that Influence Its Use as a Pesticidal Plant
Source: PubMed Central journal article supplement (PMC6963982; doi:10.3390/plants8120597), 2019-12-12

Table S1: Location and chemotype data for samples of *T. vogelii* in Tanzania, Kenya and Malawi.

| Farmer/Sample ID | Country | Latitude  | Longitude | altitude |
|------------------|---------|-----------|-----------|----------|
| 01-K             | Kenya   | 0.097752  | 37.81782  | 1168     |
| 02-K             | Kenya   | 0.325643  | 34.53851  | 1340     |
| 03-K             | Kenya   | 0.979937  | 35.15177  | 1892     |
| 04-K             | Kenya   | 0.090201  | 37.80688  | 1171     |
| 05-K             | Kenya   | -0.526584 | 37.14551  | 1663     |
| 06-K             | Kenya   | 1.011569  | 34.81895  | 1944     |
| 07-K             | Kenya   | 0.428555  | 34.83557  | 1541     |
| 08-K             | Kenya   | -1.10017  | 34.50181  | 1367     |
| 09-K             | Kenya   | 0.498218  | 34.12219  | 1141     |
| 10-K             | Kenya   | -0.559879 | 37.3352   | 1314     |
| 11-K             | Kenya   | -0.750621 | 36.83641  | 2208     |
| 12-K             | Kenya   | 0.873637  | 34.87782  | 1747     |
| 13-K             | Kenya   | -0.95086  | 34.32468  | 1274     |
| 14-K             | Kenya   | -0.759193 | 36.85265  | 2165     |
| 15-K             | Kenya   | -0.367204 | 36.92607  | 1865     |
| 16-K             | Kenya   | 0.049257  | 34.68665  | 1561     |
| 17-K             | Kenya   | -0.558601 | 37.32853  | 1300     |
| 18-K             | Kenya   | 0.757884  | 34.86166  | 1662     |
| 19-K             | Kenya   | -1.167437 | 36.95979  | 1510     |
| 20-K             | Kenya   | 0.432866  | 34.22514  | 1177     |
| 21-K             | Kenya   | 0.437587  | 34.11315  | 1184     |
| 22-K             | Kenya   | 0.743374  | 34.78629  | 1619     |
| 23-K             | Kenya   | 0.115114  | 34.63049  | 1474     |
| 24-K             | Kenya   | 0.36835   | 34.15812  | 1156     |
| 25-K             | Kenya   | 0.112597  | 34.62899  | 1478     |
| 26-K             | Kenya   | 0.110225  | 34.81027  | 1639     |
| 27-K             | Kenya   | 0.211953  | 34.82631  | 1530     |
| 28-K             | Kenya   | -0.517841 | 37.37005  | 1413     |
| 29-K             | Kenya   | -1.074544 | 37.1823   | 1452     |
| 30-K             | Kenya   | 1.098055  | 34.78232  | 2137     |
| 31-K             | Kenya   | 1.014987  | 34.81005  | 1997     |
| 32-K             | Kenya   | 1.176398  | 34.93681  | 1869     |
| 33-K             | Kenya   | -1.098766 | 37.03414  | 1504     |
| 34-K             | Kenya   | -1.099615 | 34.43201  | 1342     |
| 35-K             | Kenya   | 0.257286  | 34.76586  | 1475     |
| 36-K             | Kenya   | -0.517195 | 37.13713  | 1684     |
| 37-K             | Kenya   | 0.06437   | 34.66981  | 1548     |
| 38-K             | Kenya   | -0.515672 | 37.36573  | 1398     |
| 39-K             | Kenya   | 0.093449  | 37.81905  | 1155     |

|       |          |           |          |        |
|-------|----------|-----------|----------|--------|
| 40-K  | Kenya    | 0.758926  | 34.87193 | 1680   |
| 41-K  | Kenya    | -0.78523  | 36.91462 | 1928   |
| 42-K  | Kenya    | -0.080452 | 34.82601 | 1150   |
| 43-K  | Kenya    | -1.136357 | 34.60511 | 1389   |
| 44-K  | Kenya    | 0.143038  | 34.62155 | 1430   |
| 45-K  | Kenya    | 0.091232  | 37.81236 | 1164   |
| 46-K  | Kenya    | 0.274213  | 34.59082 | 1310   |
| 47-K  | Kenya    | -0.506081 | 37.12583 | 1706   |
| 48-K  | Kenya    | 0.092842  | 37.82547 | 1160   |
| 49-K  | Kenya    | -0.985336 | 36.94538 | 1625   |
| 50-K  | Kenya    | 0.77217   | 34.81198 | 1635   |
| 51-K  | Kenya    | -0.965147 | 34.48188 | 1393   |
| 52-K  | Kenya    | 0.331085  | 34.3008  | 1269   |
| 53-K  | Kenya    | 0.756035  | 34.85681 | 1651   |
| 54-K  | Kenya    | -0.783291 | 36.93494 | 1751   |
| 55-K  | Kenya    | 1.278913  | 35.09086 | 2075   |
| 56-K  | Kenya    | 0.784362  | 34.86308 | 1685   |
| 57-K  | Kenya    | 0.771604  | 34.78512 | 1689   |
| 01-M  | Malawi   | -14.19613 | 33.76749 | 1182   |
| 02-M  | Malawi   | -14.21196 | 33.75928 | 1173   |
| 03-M  | Malawi   | -14.1534  | 33.78207 | 1108   |
| 04-M  | Malawi   | -14.18489 | 33.77386 | 1131   |
| 05-M  | Malawi   | -14.20842 | 33.74425 | 1147   |
| 06-M  | Malawi   | -14.19637 | 33.77437 | 1182   |
| 07-M  | Malawi   | -14.19637 | 33.77437 | 1146   |
| 08-M  | Malawi   | -14.23192 | 33.80106 | 1185   |
| 09-M  | Malawi   | -14.19613 | 33.76749 | 1182   |
| 10-M  | Malawi   | -14.16169 | 33.83935 | 1124   |
| 11-M  | Malawi   | -14.20348 | 33.78574 | 1166   |
| 12-M  | Malawi   | -14.21442 | 33.76104 | 1182   |
| 13-M  | Malawi   | -14.16032 | 33.8459  | 1123   |
| 14-M  | Malawi   | -14.19999 | 33.80179 | 1164   |
| 15-M  | Malawi   | -14.21487 | 33.8955  | 1146   |
| 16-M  | Malawi   | -14.2108  | 33.8244  | 1173   |
| 17-M  | Malawi   | -14.06896 | 33.81357 | 1085   |
| 18-M  | Malawi   | -14.19637 | 33.77437 | 1182   |
| 19-M  | Malawi   | -14.21487 | 33.8955  | 1146   |
| 20-M  | Malawi   | -14.1431  | 33.84702 | 1107   |
| 01-TZ | Tanzania | -3.40427  | 36.79448 | 1174.3 |
| 02-TZ | Tanzania | -3.40427  | 36.79447 | 1183.9 |
| 03-TZ | Tanzania | -8.0209   | 35.8564  | 1883.3 |
| 04-TZ | Tanzania | -7.83219  | 35.84432 | 1677   |
| 05-TZ | Tanzania | -4.137065 | 37.9056  | 1399   |

|       |          |           |          |        |
|-------|----------|-----------|----------|--------|
| 06-TZ | Tanzania | -3.2511   | 37.24033 | 1254.9 |
| 07-TZ | Tanzania | -4.135077 | 37.91367 | 1181   |
| 08-TZ | Tanzania | -3.26394  | 37.35318 | 1289.3 |
| 09-TZ | Tanzania | -8.920116 | 33.52334 | 1788   |
| 10-TZ | Tanzania | -9.232094 | 33.63924 | 1448   |
| 11-TZ | Tanzania | -6.83867  | 37.74604 | 764.57 |
| 12-TZ | Tanzania | -6.84718  | 37.69085 | 899    |
| 13-TZ | Tanzania | -4.142703 | 37.90506 | 1428   |
| 14-TZ | Tanzania | -4.136123 | 37.91188 | 1202   |

Figure S1: Chromatograms showing: (a) Chemotype 1, presence of deguelin; (b) Chemotype 2 absence of rotenoids; (c) chemotype 3 signifying presence of chemotypes 1 and 2 suggesting a hybrid and d Presence of Chemotype 1 with minimal quantitative presence of chemotype 2.

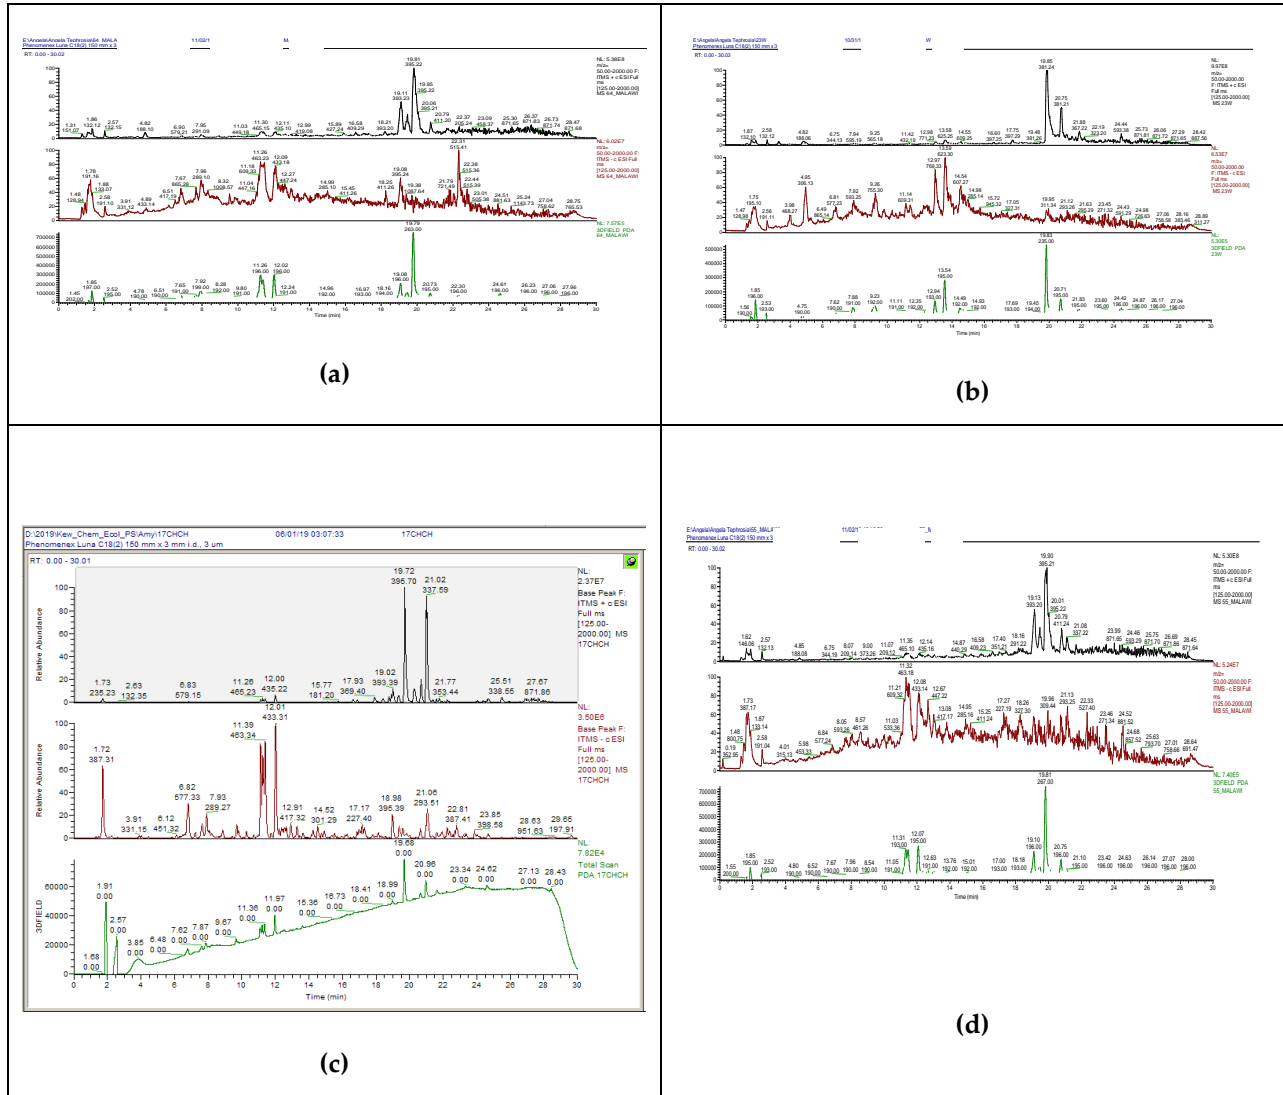

Supplement: plants-08-00597-s001.pdf [file plants-08-00597-s001.pdf]
